# Supplementary material
Source: ML conference proceedings conference paper supplement (https://proceedings.neurips.cc/paper_files/paper/2023/hash/c9b1fe9c41f1eeec3a659154d575a282-Abstract.html)
Supplement: Supplementary file 1 [file c9b1fe9c41f1eeec3a659154d575a282-Supplemental-Conference.pdf]

## A Missing Proofs from Section 3

### A.1 Equivalence of Learning a Random Target and Sequential Spanning Problem

In this subsection, we show that when  $w^*$  is drawn from  $\mathbb{S}^d$ , we can equivalently formulate the self-directed linear regression problem as the Sequential Spanning Problem (SSP). In particular, we will prove [Proposition 3.4](#), which we restated here.

**Proposition A.1 (Proposition 3.4).** *Let  $X = \{x^{(1)}, \dots, x^{(m)}\} \subseteq \mathbb{R}^d$  be a set of examples. For every self-directed linear regression algorithm  $\mathcal{A}$  over  $X$ , with expected learning loss  $\mathcal{L}(\mathcal{A}, \mathbb{S}^d)$ , we can use it to get a randomized algorithm  $\mathcal{A}'$  for SSP over  $X$  with expected cost  $\mathbf{E}(C(\sigma, m)) \leq d \mathcal{L}(\mathcal{A}, \mathbb{S}^d)$ . Moreover, given a randomized algorithm  $\mathcal{A}'$  for SSP over  $X$ , we can get a self-directed linear regression algorithm  $\mathcal{A}$  over  $X$ , with expected learning loss  $\mathcal{L}(\mathcal{A}, \mathbb{S}^d) = \mathbf{E}(C(\sigma, m))/d$ .*

To start with, we show that when  $w^* \sim \mathbb{S}^d$ , we can describe the Bayes optimal prediction. In particular, we show that given the points  $x^{(1)}, \dots, x^{(i-1)}$  the best possible prediction for the label  $y^{(i)}$  of some point  $x^{(i)}$  is  $w_{L_i}^* \cdot x^{(i)}$ , where  $L_i$  is the subspace spanned by  $x^{(1)}, \dots, x^{(i-1)}$ . We remark that the vector  $w_{L_i}^*$  can be efficiently estimated by the samples  $(x^{(1)}, y^{(1)} = w^* \cdot x^{(1)}), \dots, (x^{(i-1)}, y^{(i-1)} = w^* \cdot x^{(i-1)})$  by solving a linear system. We show the following lemma.

**Lemma A.2 (Lemma 3.2).** *Let  $X = \{x^{(1)}, \dots, x^{(n)}\} \subseteq \mathbb{R}^d$  be a set of  $n$  examples and  $w^*$  be a target vector drawn uniformly from  $\mathbb{S}^d$  that labels  $y^{(i)} = w^* \cdot x^{(i)}$  for each  $x^{(i)} \in X$ . Given any set of labeled examples  $(x^{(1)}, y^{(1)}), \dots, (x^{(i-1)}, y^{(i-1)})$ , denote by  $L_{i-1}$  the subspace spanned by  $x^{(1)}, \dots, x^{(i-1)}$  and  $w_{L_{i-1}}^*$  the projection of  $w^*$  onto  $L_{i-1}$ . Let  $\mathcal{A}$  be a self-directed learner, denote by  $\hat{y}^{(i)}$  be the prediction of  $\mathcal{A}$  for the next example  $x^{(i)}$ , then we have  $\mathbf{E}_{w^*} \left( (\hat{y}^{(i)} - y^{(i)})^2 \mid w_{L_{i-1}}^* \right) \geq \mathbf{E}_{w^*} \left( (w_{L_{i-1}}^\perp \cdot x^{(i)})^2 \mid w_{L_{i-1}}^* \right)$ . Furthermore, the inequality holds with equality if  $\hat{y}^{(i)} = w_{L_{i-1}}^* \cdot x^{(i)}$ .*

*Proof of Lemma 3.2.* We first observe that  $y^{(i)} = w^* \cdot x^{(i)} = w_{L_{i-1}}^* \cdot x^{(i)} + w_{L_{i-1}}^\perp \cdot x^{(i)}$ . We have

$$\begin{aligned} & \mathbf{E}_{w^*} \left( (\hat{y}^{(i)} - y^{(i)})^2 \mid w_{L_{i-1}}^* \right) \\ &= \mathbf{E}_{w^*} \left( (\hat{y}^{(i)} - w_{L_{i-1}}^* \cdot x^{(i)} - w_{L_{i-1}}^\perp \cdot x^{(i)})^2 \mid w_{L_{i-1}}^* \right) \\ &= \mathbf{E}_{w^*} \left( (\hat{y}^{(i)} - w_{L_{i-1}}^* \cdot x^{(i)})^2 \mid w_{L_{i-1}}^* \right) - 2 \mathbf{E}_{w^*} \left( (\hat{y}^{(i)} - w_{L_{i-1}}^* \cdot x^{(i)}) (w_{L_{i-1}}^\perp \cdot x^{(i)}) \mid w_{L_{i-1}}^* \right) \\ &+ \mathbf{E}_{w^*} \left( (w_{L_{i-1}}^\perp \cdot x^{(i)})^2 \mid w_{L_{i-1}}^* \right) \\ &\geq \mathbf{E}_{w^*} \left( (w_{L_{i-1}}^\perp \cdot x^{(i)})^2 \mid w_{L_{i-1}}^* \right), \end{aligned}$$

where the inequality holds because  $\mathbf{E}_{w^*} \left( w_{L_{i-1}}^\perp \cdot x^{(i)} \mid w_{L_{i-1}}^* \right) = 0$ , as  $w^*$  is drawn uniformly from the unit sphere.  $\square$

With the Bayes optimal prediction rule, we are able to connect the self-directed learning problem with SSP directly via the following Lemma. We show that the cost of any self-directed algorithm that picks a sequence of  $d$  points  $x^{(1)}, \dots, x^{(d)}$  of a dataset  $X$  is at least  $(1/d) \sum_{i=1}^d \|x_{L_{i-1}}^\perp\|^2$ , i.e., at every step the algorithm pays for the (squared) length of  $x^{(i)}$  that is not contained in the subspace spanned by its first  $i-1$  choices  $x^{(1)}, \dots, x^{(i-1)}$ .

**Lemma A.3.** *Let  $w^*$  be a uniform random vector over  $\mathbb{S}^d$ . Let  $\{x^{(1)}, \dots, x^{(m)}\}$  be a sequence of points in  $\mathbb{R}^d$ . Denote by  $L_i$  the subspace spanned by  $x^{(1)}, \dots, x^{(i)}$ , for  $i \in [d]$ . Every self-directed learner  $\mathcal{A}$  that learns  $w^*$  with (random) sequence  $\{x^{(1)}, \dots, x^{(d)}\}$  has an expected cost  $\mathcal{L}(\mathcal{A}, \mathbb{S}^d) \geq \frac{1}{d} \mathbf{E} \left( \sum_{i=1}^d \left\| (x^{(i)})_{L_{i-1}}^\perp \right\|^2 \right)$ . Furthermore, the inequality holds for equality if  $\mathcal{A}$  always uses the prediction rule in [Lemma 3.2](#).*

*Proof of Lemma A.3.* We may assume that  $m = d$  and random points  $\{x_1, \dots, x_d\}$  are linearly independent. By Lemma 3.2, we know that the optimal hypothesis we use to predict in each round is  $w_{L_{i-1}}^*$ . Based on this observation, we obtain that

$$\begin{aligned}
\mathcal{L}(\mathcal{A}, \mathbb{S}^d) &= \mathbf{E} \sum_{i=1}^d (\hat{y}^{(i)} - y^{(i)})^2 = \sum_{i=1}^d \mathbf{E}_{w^*} \left( (\hat{y}^{(i)} - y^{(i)})^2 \mid w_{L_{i-1}}^* \right) \geq \sum_{i=1}^d \mathbf{E}_{w^*} \left( (w_{L_{i-1}}^* \cdot x^{(i)})^2 \mid w_{L_{i-1}}^* \right) \\
&= \sum_{i=1}^d \mathbf{E}_{w^*} \left( (w_{L_{i-1}}^* \cdot (x^{(i)})_{L_{i-1}^\perp})^2 \mid w_{L_{i-1}}^* \right) \\
&= \sum_{i=1}^d \mathbf{E}_{w^*} \left( \left\| w_{L_{i-1}}^* \right\|^2 \left\| (x^{(i)})_{L_{i-1}^\perp} \right\|^2 \left( \frac{w_{L_{i-1}}^*}{\left\| w_{L_{i-1}}^* \right\|} \cdot \frac{(x^{(i)})_{L_{i-1}^\perp}}{\left\| (x^{(i)})_{L_{i-1}^\perp} \right\|} \right)^2 \mid w_{L_{i-1}}^* \right) \\
&= \mathbf{E} \sum_{i=1}^d \frac{d-i+1}{d} \frac{1}{d-i+1} \left\| (x^{(i)})_{L_{i-1}^\perp} \right\|^2 = \mathbf{E} \sum_{i=1}^d \frac{1}{d} \left\| (x^{(i)})_{L_{i-1}^\perp} \right\|^2.
\end{aligned}$$

Here, in the second last equality, we use the fact that for any fixed  $k$  dimensional subspace, the expected square of the norm of  $w^*$  (which is drawn uniformly from the unit sphere) projected onto that subspace is  $k/d$ . □

The proof of Proposition 3.4 can be obtained as a direct corollary of Lemma A.3.

*Proof of Proposition 3.4.* We first show how to construct a randomized algorithm  $\mathcal{A}'$  for SSP based on a self-directed learner  $\mathcal{A}$ .  $\mathcal{A}'$  works as follows. We draw some  $w^* \sim \mathbb{S}^d$  run  $\mathcal{A}$  over  $X$  to learn  $w^*$ .  $\mathcal{A}'$  outputs  $\sigma$ , the order of the examples we select during the learning process. By Lemma A.3, we know that  $\mathbf{E} C(\sigma, m) \leq d\mathcal{L}(\mathcal{A}, \mathbb{S}^d)$ .

Next, we show that given a randomized algorithm  $\mathcal{A}'$  for SSP over  $X$ , we can efficiently construct a self-directed learner. We run  $\mathcal{A}'$  over  $X$  to obtain an order  $\sigma$  of examples in  $X$ . Learner  $\mathcal{A}$  selects examples according to  $\sigma$  and make a prediction according to Lemma A.3. By Lemma A.3, we know that  $\mathcal{L}(\mathcal{A}, \mathbb{S}^d) = \mathbf{E} C(\sigma, m)/d$ . □

## A.2 Approximating $k$ -SSP via Approximating SSP

In this subsection, we show that if we can compute an approximate solution to SSP over  $X$  efficiently, then we can also compute an approximate solution to  $k$ -SSP over  $X$  efficiently for every  $k$ . In this section, we will use  $\alpha(d, m) : \mathbb{N} \times \mathbb{N} \mapsto \mathbb{R}^+$  to denote the approximate ratio of an approximate algorithm. Formally, we will prove Lemma 3.9, which we restate again here.

**Lemma A.4 (Lemma 3.9).** *Assume that an algorithm for SSP in  $d$  dimensions exists that finds an  $\alpha(d, m)$ -approximate solution in  $\text{poly}(d, m)$  time. Then an algorithm that finds a  $4\alpha(m(d+m), m(d+m))$ -approximate solution for  $k$ -SSP for every value of  $k$  in  $\text{poly}(d, m)$  time exists.*

Let  $X \subseteq \mathbb{R}^d$  be a set of  $m$  points. We say  $X$  is in general position if any subset of  $k$  points of  $X$  is linearly independent. The proof of Lemma 3.9 can be broken down into two steps.

In the first step, we claim that given any set of examples  $X$ , we are able to put them to general position efficiently while preserving the SSP-cost of every permutation of  $X$  within a factor of 2.

**Claim A.5.** *Given  $X \subseteq \mathbb{R}^d$ , a set of  $m$  points, we can efficiently construct a map  $f : X \rightarrow \mathbb{R}^{d+m}$  such that  $f(X)$  is in general position. Furthermore, for every sequence of points  $\sigma = (x^{(1)}, \dots, x^{(m)})$ , denote by  $f(\sigma) = (f(x^{(1)}), \dots, f(x^{(m)}))$ , then  $C(\sigma, k) \leq C(f(\sigma), k) \leq 2C(\sigma, k)$ .*

*Proof of Claim.* Assume  $X = \{x^{(1)}, \dots, x^{(m)}\}$ . Without loss of generality, we assume  $\min_{i \in [m]} \|x^{(i)}\| = 1$ . The mapping  $f$  is defined as follows. We map each  $x^{(i)}$  to a vector  $f(x^{(i)}) = x^{(i)'} + \epsilon e_{d+i}$  in  $\mathbb{R}^{d+m}$  for some  $\epsilon \leq 1/k^2$ . Here,  $(x^{(i)'})_j = x_j^{(i)}$  if  $j \leq d$ ,  $(x^{(i)'})_j = 0$

otherwise and  $e_{d+i}$  is  $d+i$ -th standard basis vector in  $\mathbb{R}^{d+m}$ . It is easy to see that  $f(X)$  is linearly independent and thus  $f(X)$  is in general position. It remains to show  $f$  preserve the cost of an ordered sequence of points. Let  $\sigma$  be any sequence of points. Without loss of generality, we assume that  $\sigma = (x^{(1)}, \dots, x^{(m)})$ . To simplify the notation, we denote by  $f(L_i)$  the subspace spanned by  $\{f(x^{(1)}), \dots, f(x^{(i)})\}$ . Based on our construction, we have decomposition  $f(L_i) = L'_i \oplus E_i$ , where  $L'_i$  is the subspace spanned by  $x^{(1)'}, \dots, x^{(i)'}$  and  $E_i$  is the subspace spanned by  $e_{d+1}, \dots, e_{d+i}$ . This implies that

$$\text{proj}_{f(L_i)^\perp} f(x^{(i+1)'}) = \text{proj}_{(L'_i)^\perp} x^{(i+1)'} + \epsilon e_{d+i+1}.$$

Thus, we obtain that

$$C(\sigma, k) \leq C(f(\sigma), k) = C(\sigma, k) + k\epsilon^2 \leq 2C(\sigma, k),$$

where the last inequality follows by  $C(\sigma, k) \geq 1$  and  $k\epsilon^2 \leq 1$ .

◇

In the second step, we show that given any set of examples  $X$  in general position, we are able to construct an efficient approximate algorithm for  $k$ -SSP over  $X$  via an efficient approximate algorithm for SSP over  $X$ .

**Claim A.6.** *Let  $X \subseteq S^d$  be a set of  $m$  points in general position. Let  $\mathcal{A}$  be an  $\alpha(d, m)$ -approximate algorithm for geometry latency problem. We can efficiently use  $\mathcal{A}$  to obtain a  $2\alpha(dk, dm)$ -approximate solution to the  $k$ -SSP over  $X$ .*

*Proof of Claim.* Without loss of generality, we assume  $k < d$ . Otherwise, if  $k \geq d$ , we can run  $\mathcal{A}$  over  $X$  directly and pick the first  $k$  points in order in the output solution. This solution is an  $\alpha(d, m)$ -approximate solution. So in the rest of the proof, we assume  $k < d$ .

Let  $X \subseteq S^d$  be a set of  $m$  points in general position. We first construct a set of  $dm$  examples  $X'$  in  $\mathbb{R}^{dk}$  as an input to  $\mathcal{A}$ . For  $i \in [m]$ , we denote by  $x^{(i)'}$  the following vector in  $\mathbb{R}^{dk}$ .  $(x^{(i)'})_j = x_j^{(i)}$  if  $j \leq d$ ,  $(x^{(i)'})_j = 0$  otherwise. For  $i \in [dk]$ , denote by  $e_i$  the  $i$ th standard basis in  $\mathbb{R}^{dk}$ . For each  $x^{(i)} \in X$ , we create  $d$  examples  $x^{(ij)}$  for  $j \in [d]$  such that  $x^{(ij)} = x^{(i)'} + \epsilon \xi^{(ij)}$ , where  $\xi^{(ij)}$  is a random vector drawn uniformly from the unit sphere, in the subspace spanned by  $e_{d+1}, \dots, e_{kd}$  and  $\epsilon > 0$  is a tiny number we will determine later.

Next, we run  $\mathcal{A}$  over the new dataset  $X'$  and get a solution  $\sigma' = x^{(i_1 j_1)}, x^{(i_2 j_2)}, \dots$  to the SSP over  $X'$ . We construct a solution  $\sigma$  in the following way. For  $\ell \in [dm]$ , we write  $x^{(i_\ell j_\ell)} = x^{(i_\ell)'} + \epsilon \xi^{(i_\ell j_\ell)}$ . We go through  $\sigma'$  and every time we see a point  $x^{(i_\ell j_\ell)}$  constructed from a new  $x^{(i_\ell)'}$ . We append  $x^{i_\ell}$  to our solution  $\sigma$ . We output  $\sigma$  if we have appended  $k$  points to  $\sigma$ . Notice that for every  $i, j$ ,  $x^{(i)'}$  and  $\xi^{(ij)}$  are orthogonal to each other. So every time a point  $x^{(ij)}$  constructed from some new  $x^{(i)}$  is included in  $\sigma'$ , we pay at least  $\left\| \text{proj}_{L_{i-1}^\perp} x^{(i)} \right\|^2$ , where  $L_{i-1}$  is the subspace spanned by the previous  $i-1$  examples in  $X$  that we have used. This implies that

$$C(\sigma, k) \leq C(\sigma', dm).$$

Denote by  $\sigma^*$  the optimal solution to the  $k$ -SSP over  $X$ . We will show  $\sigma$  is a good approximate solution by constructing another solution  $\bar{\sigma}$  to the SSP over  $X'$  such that  $C(\bar{\sigma}, dm)$  lower bounds  $C(\sigma^*, k)$  within a factor of 2. We construct  $\bar{\sigma}$  in two stages. Assume  $\sigma^* = (x^{(i_1)}, \dots, x^{(i_k)})$ . In the first stage, for  $\ell \in [k]$ , we append  $(x^{(i_\ell 1)}, \dots, x^{(i_\ell d)})$  to  $\bar{\sigma}$ . In the second stage, we append the remaining points in  $X'$  to  $\bar{\sigma}$  with arbitrary order. We first bound the cost in the first stage. Use the fact that for every  $i, j$ ,  $x^{(i)'}$  and  $\xi^{(ij)}$  are orthogonal to each other again. It is not hard to see the cost in the first stage is at most  $C(\sigma^*, k) + dk\epsilon^2$ . As  $C(\sigma^*, k) \geq 1$ , we have the cost in the first stage is at most  $2C(\sigma^*, k)$  by choosing  $\epsilon^2 \leq 1/(dk)$ .

It remains to show that with probability 1, the cost of the second stage is 0. Since in the first stage, we added  $dk$  points to  $\bar{\sigma}$ , it is sufficient to show that with probability 1, these  $dk$  examples are linearly independent. Suppose we have added  $(x^{(i_1 1)}, \dots, x^{(i_1 d)}), \dots, (x^{(i_{\ell-1} 1)}, \dots, x^{(i_{\ell-1} d)}), (x^{(i_\ell 1)}, \dots, x^{(i_\ell j)})$  to  $\bar{\sigma}$  and these  $d(\ell-1)+j$  points are linearly independent. We show that with probability 1 if we add  $x^{(i_\ell, j+1)}$  to  $\bar{\sigma}$  they are still

linearly independent. Since  $X$  is in general position, we know that  $x^{(i_1)}, \dots, x^{(i_\ell)}$  are linearly independent. This implies if  $x^{(i_{\ell,j+1})}$  is in the subspace spanned by the previous  $d(\ell-1) + j$  points then  $x^{(i_{\ell,j+1})}$  is in the subspace spanned by  $(x^{(i_{\ell 1})}, \dots, x^{(i_{\ell j})})$ . Again, we use the fact that for every  $i, j$ ,  $x^{(i)'}$  and  $\xi^{(ij)}$  are orthogonal to each other. This implies that  $\xi^{(i_{\ell,j+1})}$  is in the subspace spanned by  $(\xi^{(i_{\ell 1})}, \dots, \xi^{(i_{\ell j})})$ . This probability is 0 because the noise vectors are drawn from a  $d(k-1)$ -dimensional sphere uniformly. This implies that with probability 1 the points we added in the first stage are linearly independent.

So, we get  $C(\bar{\sigma}, k) \leq 2C(\sigma^*, k)$ . To finish the proof, we have

$$C(\sigma, k) \leq C(\sigma', dm) \leq \alpha(dk, dm)C(\bar{\sigma}, k) \leq 2\alpha(dk, dm)C(\sigma^*, k).$$

So we construct a  $2\alpha(dk, dm)$ -approximate solution  $\sigma$  to the  $k$ -SSP over  $X$  efficiently.  $\diamond$

*Proof of Lemma 3.9.* Let  $\mathcal{A}$  be an  $\alpha(d, m)$ -approximate algorithm for SSP. Denote by  $\text{opt}$  the optimum of the  $k$ -SSP over  $X$ . Assume that  $\text{opt}$  is achieved by some sequence  $\sigma^*$ . Since  $X$  may not be in general position, we use Claim A.5 to obtain a dataset  $f(X)$  that is in general position. Let  $f(\sigma)$  be an  $\alpha$ -approximate solution to the  $k$ -SSP over  $f(X)$ . Then  $\sigma$  is a  $2\alpha$ -approximate solution to the  $k$ -SSP over  $X$ . This is because

$$C(\sigma, k) \leq C(f(\sigma), k) \leq \alpha C(f(\sigma^*), k) \leq 2\alpha C(\sigma^*, k).$$

Now we have a set of  $m$  points  $f(X)$  in  $\mathbb{R}^{d+m}$  that is in general position. By Claim A.6, we know that we can use  $\mathcal{A}$  to obtain a  $2\alpha((d+m)k, (d+m)m)$ -approximate solution to the  $k$ -SSP over  $f(X)$ . Thus, we conclude that we can efficiently find a  $4\alpha((d+m)k, (d+m)m)$ -approximate solution to the  $k$ -SSP over  $X$ .  $\square$

### A.3 Approximating $k$ -edge Packing via Approximating $k$ -SSP

In this subsection, we show that given an approximate algorithm for  $k$ -SSP, we can use it to design an efficient approximate algorithm for  $k$ -edge packing.

**Lemma A.7 (Lemma 3.8).** *If there is an  $\alpha(d, m)$ -approximate algorithm for  $k$ -SSP problem, then there is a  $2\alpha(n, m)$ -approximate algorithm for  $k$ -edge packing problem*

*Proof of Lemma 3.8.* Let  $G = (V, E)$  be an instance of  $k$ -edge packing problem, and let  $\mathcal{A}$  be an efficient algorithm for  $k$ -SSP. We will show we can use  $\mathcal{A}$  to construct an efficient algorithm that outputs a  $2\alpha$ -approximate solution to the  $k$ -edge packing problem. To do this, we first construct an instance of  $k$ -SSP based on  $G$ . Recall that  $G$  contains  $n$  vertices and  $m$  edges. For every edge  $e = (u, w)$ ,  $u < w$ , we construct a vector  $v_e \in \mathbb{R}^n$  such that  $(v_e)_u = 1$ ,  $(v_e)_w = -1$  and  $(v_e)_s = 0$  for  $s \notin \{u, w\}$ . We run  $\mathcal{A}$  over  $X = \{v_e\}_{e \in E}$  and obtain a sequence  $\sigma = (v_{e_1}, \dots, v_{e_k})$  of  $k$  points in  $X$ . Our goal is to show  $S = \{e_1, \dots, e_k\}$  is a  $2\alpha$ -approximate solution to the  $k$ -edge packing problem.

We first lower bound  $C(\sigma, k)$ . Recall that  $C(X, \sigma) = \sum_{i=1}^k \|\text{proj}_{L_{i-1}^\perp} v_{e_i}\|_2^2$ , where  $L_{i-1}$  is the subspace spanned by  $v_{e_1}, \dots, v_{e_{i-1}}$ . Now we only consider the cost for every  $e_i$  such that when we add  $e_i$  to  $\{e_1, \dots, e_{i-1}\}$ , we introduce new vertices to the solution. There are two cases we will consider. In the first case, adding  $e_i$  will introduce two new vertices  $u, w$ . This implies that  $(v_{e_j})_u = (v_{e_j})_w = 0$  for every  $j \leq i-1$ . Thus  $v_{e_i} \perp L_{i-1}$  and the cost of picking  $v_{e_i}$  is 2. In the second case, adding  $e_i$  will only introduce one new vertex  $u$ . This implies that  $(v_{e_j})_u = 0$  for every  $j \leq i-1$  and thus we will pay at least 1 for picking  $v_{e_i}$ . This gives the following lower bound  $C(\sigma, k) \geq |V(S)|$ , where  $V(S)$  is the set of vertices covered by  $S$ .

Next, let  $S^*$  be the optimal solution to the  $k$ -edge packing problem. We will use  $S^*$  to construct a solution  $\sigma^*$  to the  $k$ -SSP such that  $C(\sigma^*, k) \leq 2\text{opt}$ , where  $\text{opt}$  is the optimum of the  $k$ -edge packing problem. We first decompose  $S^*$  into disjoint connected components  $C_1, \dots, C_\ell$ . The order  $\sigma^*$  is constructed in two stages.

In the first stage, we start with an arbitrary edge  $e_1 \in C_1$  and add  $v_{e_1}$  to  $\sigma^*$ . Next, we keep adding  $v_{e_i} \in C_1$  so that we only introduce one new vertex by adding  $e_i$  to  $\sigma^*$ . If adding one edge from  $e_1$

will not introduce new vertices in  $C_1$ , then we start adding vectors whose corresponding edges are from  $C_2$  in the same way. The first stage finishes when we will not introduce any new vertex by adding any vector to  $S^*$ . In the second stage, we add vectors corresponding to the remaining edges with an arbitrary order.

Notice that there are at most  $\text{opt}$  vertices. This implies that in the first stage, we add at most  $\text{opt}$  vectors and each vector charges us at most 2. So, the cost in the first stage is at most  $2\text{opt}$ . To show  $C(\sigma^*, k) \leq 2\text{opt}$ , we will show the cost is 0 in the second stage. Notice that after the first stage, the edges we added to  $\sigma^*$  construct  $\ell$  spanning trees. Thus, adding any new edge will create a cycle. Assume  $u_1, u_2, \dots, u_\ell$  to be an arbitrary path in  $G$  such that  $v\{v_{(u_i, u_{i+1})} \mid i \in [\ell - 1]\}$  has been added to  $\sigma^*$ . Furthermore, we assume that we are adding  $v_{(u_1, u_\ell)}$  to  $\sigma^*$  in the second stage. Since  $v_{(u_1, u_\ell)} = \sum_{i=1}^{\ell-1} v_{(u_i, u_{i+1})}$ , we know the cost of adding  $v_{(u_1, u_\ell)}$  is 0. Thus, the cost for the second stage is 0 and we obtain that  $C(\sigma^*, k) \leq 2\text{opt}$ .

Finally, we conclude that  $S$  is a  $2\alpha(n, m)$ -approximate solution to the  $k$ -edge packing problem because

$$|V(S)| \leq C(\sigma, k) \leq \alpha(n, m)C(\sigma^*, k) \leq 2\alpha(n, m)\text{opt}.$$

Thus, we constructed an efficient  $2\alpha(n, m)$ -approximate algorithm for the  $k$ -edge packing problem using  $\mathcal{A}$ . □

#### A.4 Approximating DkS via Approximating $k$ -edge Packing

In this subsection, we show if we can compute an approximate solution to  $k$ -edge packing efficiently then we can approximate DkS.

**Lemma A.8 (Lemma 3.10).** *If there is an  $\alpha$ -approximate algorithm for  $k$ -edge packing problem, then there is an  $\alpha^2$ -approximate algorithm for DkS problem.*

*Proof of Lemma 3.10.* For every  $k \in [n]$ , we define  $\rho_k$  to be the optimal density for the DkS problem over graph  $G$ . To prove the lemma, we first show the following claim.

**Claim A.9.**  $\rho_k \geq \rho_{k+1}$  for every  $k \in [n]$ .

*Proof of Claim.* Assume there is some  $k$  such that  $\rho_k < \rho_{k+1}$  instead. Let  $S_{k+1}$  be a set of  $k+1$  vertices such that  $\rho(S_{k+1}) = \rho_{k+1}$ . This implies

$$|E(S_{k+1})| = \rho_{k+1} \frac{k(k+1)}{2} = \rho_{k+1} \frac{k(k-1)}{2} + \rho_{k+1}k.$$

Notice that the minimum degree of a vertex in  $S_{k+1}$  is at most  $\rho_{k+1}k$ , otherwise  $S_{k+1}$  has more than  $\rho_{k+1} \binom{k+1}{2}$  edges. This implies that if we delete the vertex with minimum degree from  $S_{k+1}$ , we get a subgraph of  $G$  that contains  $k$  vertices and  $\rho_{k+1} \binom{k}{2} > \rho_k \binom{k}{2}$ . This contradicts the definition of  $\rho_k$ . ◇

Now we show how to use Claim A.9 to prove Lemma 3.10. Denote by  $\mathcal{A}(k)$  an  $\alpha$ -approximate algorithm for  $k$ -edge packing problem, we will show we can run  $\mathcal{A}$  for  $m$  times to output an  $\alpha^2$ -approximate solution to the DkS problem. Our algorithm works as follows. For  $i \in [m]$ , we run  $\mathcal{A}(i)$  to solve an  $i$ -edge packing problem over graph  $G$ . Denote by  $i^*$  the largest number such that using the solution output by  $\mathcal{A}(i^*)$ , we cover  $k$  vertices. Denote by  $S^*$  the corresponding set of vertices. We show that  $S^*$  gives an  $\alpha^2$ -approximate solution to the DkS problem.

We observe that for every  $i \in [m]$ , if the minimum number of vertices that can be covered by  $i$  edges is  $j$ , then  $i = \rho_j \binom{j}{2}$ . Since  $\mathcal{A}$  is an  $\alpha$ -approximate algorithm for  $i^*$ -edge packing problem, we know that there is some  $k' \in [k/\alpha, k]$  such that

$$i^* = \rho_{k'} \binom{k'}{2} \geq \rho_k \frac{k'(k'-1)}{2} \geq \frac{1}{\alpha^2} \rho_k \binom{k}{2},$$

where the first inequality follows by Claim A.9 and the second inequality follows by  $k' \geq k/\alpha$ . This implies that  $\rho(S^*) \geq \rho_k/\alpha^2$  and thus we get an efficient  $\alpha^2$ -approximate algorithm for DkS problem. □

## B Missing Proofs from Section 4

### B.1 Labeling a Random Set of Examples

Since in this section, we are focusing on the cost of labeling a random set, which is a slightly different task from labeling a fixed set in Section 3, before presenting the missing proofs in Section 4, we first reexplain the notations and the benchmark to avoid confusion.

We start with the worst-case setting. Let  $\mathcal{C}$  be a concept class of function from  $\mathbb{R}^n \rightarrow \mathbb{R}$  and let  $f \in \mathcal{C}$  be the unknown target concept. Let  $\mathcal{A}$  be a self-directed learner and let  $X$  be a random set of examples drawn from some distribution  $D$ . Let random variable  $L(\mathcal{A}, X, f)$  be the loss suffered by  $\mathcal{A}$  during the learning process, where the randomness comes from the dataset  $X$  and the internal randomness of  $\mathcal{A}$ . We say  $\mathcal{A}$  labels dataset  $X$  with loss  $L$  if with probability 99% ,  $L(\mathcal{A}, X, f) \leq L$ . We will use  $\mathcal{L}(\mathcal{A}, X, f) \in \mathbb{R}$  to denote such a bound of loss  $L$ . Furthermore,  $\mathcal{L}(\mathcal{A}, X) = \max_{f \in \mathcal{C}} \mathcal{L}(\mathcal{A}, X, f)$ .

A slightly easier setting is when  $f$  is drawn from a prior distribution  $F$ . This average-case setting is a very natural relaxation of the worst-case setting. In this setting, for a fixed set of examples  $X$ , we use  $\mathcal{L}(\mathcal{A}, X, F) = \mathbb{E}_{\mathcal{A}, f} L(\mathcal{A}, X, f)$  to denote the expected loss suffer by  $\mathcal{A}$ , where the randomness comes from  $f$  and  $\mathcal{A}$ . When  $X$  is drawn from a distribution  $D$ ,  $\mathcal{L}(\mathcal{A}, X, F)$  is a random variable of  $X$ . In this setting, we are more interested in if with probability at least 99%, we can draw a dataset  $X$  from  $D$  such that  $\mathcal{A}$  can approximate the best learner to learn  $f \sim F$  over  $X$ .

Finally, we will consider the gain from ordering for labeling a random dataset  $X$ . We observe that for the linear regression problem when  $X \sim D$  and the size of  $X$  is large, a random sequence of  $d$  examples from  $X$  is roughly a sequence of i.i.d. examples. Based on this observation, instead of competing with the performance of a learner  $\mathcal{A}^{\text{random}}$  that selects a random order for every realization of  $X$ , we choose to compete with the average performance of  $\mathcal{A}^{\text{random}}$ . This is a reasonable benchmark and will not make our analysis over complicated due to some extreme cases. Formally, for the average-case setting, the benchmark we want to compete with is  $\min_{\mathcal{A}^{\text{random}}} \mathcal{L}(\mathcal{A}^{\text{random}}, X) \in \mathbb{R}$ . And the gain from the ordering of a learner  $\mathcal{A}$  is a random variable

$$\mathcal{G}(\mathcal{A}, X, F) = \frac{\min_{\mathcal{A}^{\text{random}}} \mathbb{E}_{X \sim D} \mathcal{L}(\mathcal{A}^{\text{random}}, X, F)}{\mathcal{L}(\mathcal{A}, X, F)},$$

where the randomness only comes from  $X$ . For the worst-case setting, the benchmark we want to compete with is  $\min_{\mathcal{A}^{\text{random}}} \max_{f \in \mathcal{C}} \mathbb{E}_{X \sim D} L(\mathcal{A}^{\text{random}}, X, f) \in \mathbb{R}$  and the gain from the ordering of a learner  $\mathcal{A}$  is a positive number

$$\mathcal{G}(\mathcal{A}, X) = \frac{\min_{\mathcal{A}^{\text{random}}} \max_{f \in \mathcal{C}} \mathbb{E}_{X \sim D} L(\mathcal{A}^{\text{random}}, X, f)}{\mathcal{L}(\mathcal{A}, X)}.$$

### B.2 Learning in Random Order

To understand the gain of ordering examples, we need to first understand the performance of the best self-directed learner that learns with a random order. We will show that  $\min_{\mathcal{A}^{\text{random}}} \mathbb{E}_{X \sim D} \mathcal{L}(\mathcal{A}^{\text{random}}, X, \mathbb{S}^d)$ ,  $\min_{\mathcal{A}^{\text{random}}} \max_{f \in \mathcal{C}} \mathbb{E}_{X \sim D} L(\mathcal{A}^{\text{random}}, X, f) \in \Theta(1)$ , which can be obtained immediately by Lemma B.2 and Lemma B.3. To start with, we present the following probability lemma that will be used multiple times in this section.

**Lemma B.1.** *Let  $L \subseteq \mathbb{R}^d$  be a  $k$ -dimensional subspace, where  $k \leq d$ . Let  $w$  be a random vector sampled uniformly from  $S^{d-1}$ . Then the random variable  $\|\text{proj}_L(w)\|^2 \sim \text{Beta}(k/2, (d-k)/2)$ .*

*Proof of Lemma B.1.* Without loss of generality, we assume  $L$  is the subspace spanned by the first  $k$  basis vectors. Then the random variable  $\|\text{proj}_L(w)\|^2 = \sum_{i=1}^k w_i^2$  is equivalent to the random variable  $\sum_{i=1}^k (x^i)^2 / \sum_{i=1}^d (x^i)^2$ , where for  $i \in [d]$ ,  $x^i$  is independently drawn from a standard normal distribution  $N(0, 1)$ . The distribution of  $\sum_{i=1}^k (x^i)^2 / \sum_{i=1}^d (x^i)^2$  is  $\text{Beta}(k/2, (d-k)/2)$ .  $\square$

Given the above probability lemma, we are able to compute the following information-theoretic lower bound for any learner that learns from a random order.

**Lemma B.2** (Information Theoretic Lower Bound for Learning from A Random Order). *Let  $w^* \sim \mathbb{S}^d$  be a target vector, and let  $X$  be a set of  $n \geq \text{poly}(d)$  examples drawn i.i.d. from  $\mathbb{S}^d$ . Denote by  $\mathcal{A}$  a learner that learns  $w^*$  with a random order of  $X$ . In expectation, we have  $\mathbf{E}_{X \sim D} \mathcal{L}(\mathcal{A}, X, \mathbb{S}^d) \geq \frac{1}{2}$ .*

*Proof of Lemma B.2.* By Lemma A.3, we know that in expectation,  $\mathcal{L}(\mathcal{A}, X, \mathbb{S}^d) \geq \mathbf{E} \sum_{i=1}^d \frac{1}{d} \left\| (x^{(i)})_{L_{i-1}^\perp} \right\|^2$ , where  $x^{(i)}$  is the  $i$ -th example selected in the random order. Since  $X$  is drawn i.i.d. from  $\mathbb{S}^d$  and the order we select is uniform at random, we know from Lemma B.1 that  $\left\| (x^{(i)})_{L_{i-1}^\perp} \right\|^2 \sim \text{Beta}((d-i+1)/2, (i-1)/2)$  and has an expectation  $(d-i+1)/d$ . Sum these expectations together, we obtain that  $\mathcal{L}(\mathcal{A}, X, \mathbb{S}^d) \geq \frac{1}{2}$ .  $\square$

On the other hand, given any target  $w^*$ , a learner that selects a random order of examples also learns  $w^*$  with an expected cost of  $O(1)$ .

**Lemma B.3** (Upper Bound the Cost of Learning from A Random Order). *There is a self-directed learner  $\mathcal{A}$  that learns an arbitrary  $w^* \in \mathbb{S}^d$  with an expected cost  $\mathbf{E}_{X, \mathcal{A}} L(\mathcal{A}, X, w^*) \leq \frac{1}{2}$  by selecting a random order of examples of  $X$ , where  $X$  is a set of  $n \geq \text{poly}(d)$  examples drawn i.i.d. from  $\mathbb{S}^d$ .*

*Proof of Lemma B.3.* The self-directed learner  $\mathcal{A}$  simply selects a random order  $x^{(1)}, \dots, x^{(n)}$  from  $X$  and predicts  $x^{(i+1)}$  with  $w_{L_i}^* \cdot x^{(i+1)}$ . We know that with probability 1,  $x^{(1)}, \dots, x^{(d)}$  are linearly independent. Since  $X$  is a set of examples drawn i.i.d. from  $\mathbb{S}^d$  and  $\mathcal{A}$  selects a random order, we have

$$\begin{aligned} \mathbf{E}_{X, \mathcal{A}} L(\mathcal{A}, X, w^*) &= \mathbf{E} \sum_{i=1}^d (y^{(i)} - \hat{y}^{(i)})^2 = \sum_{i=1}^d \mathbf{E}_{L_{i-1}, x^{(i)}} \left( (y^{(i)} - \hat{y}^{(i)})^2 \mid x^{(i)} \right) \\ &= \sum_{i=1}^d \mathbf{E}_{L_{i-1}, x^{(i)}} \left( (w_{L_{i-1}}^* \cdot x_i - w^* \cdot x_i)^2 \mid x^{(i)} \right) \\ &= \sum_{i=1}^d \mathbf{E}_{L_{i-1}, x^{(i)}} \left( (w_{L_{i-1}^\perp}^* \cdot x^{(i)})^2 \mid x^{(i)} \right) \\ &= \sum_{i=1}^d \mathbf{E}_{L_{i-1}, x^{(i)}} \left( \left( w_{L_{i-1}^\perp}^* \cdot (x^{(i)})_{L_{i-1}^\perp} \right)^2 \mid x^{(i)} \right) \end{aligned} \quad (1)$$

$$= \sum_{i=1}^d \mathbf{E}_{L_{i-1}, x^{(i)}} \left( \left\| w_{L_{i-1}^\perp}^* \right\|^2 \left\| (x^{(i)})_{L_{i-1}^\perp} \right\|^2 (u \cdot a)^2 \right) \quad (2)$$

$$= \sum_{i=1}^d \mathbf{E}_{L_{i-1}, x^{(i)}} \left\| w_{L_{i-1}^\perp}^* \right\|^2 \mathbf{E}_{L_{i-1}, x^{(i)}} \left\| (x^{(i)})_{L_{i-1}^\perp} \right\|^2 \mathbf{E}_{L_{i-1}, x^{(i)}} (u \cdot a)^2 \quad (3)$$

$$\begin{aligned} &= \sum_{i=1}^d \frac{d-i+1}{d} \frac{1}{d-i+1} \mathbf{E}_{L_{i-1}, x^{(i)}} \left\| (x^{(i)})_{L_{i-1}^\perp} \right\|^2 \\ &= \frac{1}{d} \sum_{i=1}^d \mathbf{E}_{L_{i-1}, x^{(i)}} \left\| (x^{(i)})_{L_{i-1}^\perp} \right\|^2. \end{aligned} \quad (4)$$

Here in (1), we use the fact that  $w_{L_{i-1}^\perp}^* \in L_{i-1}^\perp$ . In (2), we denote by  $u = w_{L_{i-1}^\perp}^* / \left\| w_{L_{i-1}^\perp}^* \right\|$ ,  $a = (x^{(i)})_{L_{i-1}^\perp} / \left\| (x^{(i)})_{L_{i-1}^\perp} \right\|$ . In (3), we use the fact that  $(u \cdot a)^2$  is independent on the knowledge of  $w_{L_{i-1}^\perp}^*$  and  $\left\| (x^{(i)})_{L_{i-1}^\perp} \right\|$ . Furthermore, we notice that  $w_{L_{i-1}^\perp}^*$  is the projection of  $w^*$  onto a random  $d-i+1$  dimensional subspace. So we obtain  $\mathbf{E} \left\| w_{L_{i-1}^\perp}^* \right\|^2 = (d-i+1)/d$ . Furthermore, we know

that given the knowledge of  $w_{L_{i-1}^\perp}^*$ ,  $a = (x^{(i)})_{L_{i-1}^\perp} / \|(x^{(i)})_{L_{i-1}^\perp}\|$  is uniformly drawn from the unit sphere in  $L_{i-1}^\perp$ . By [Lemma B.1](#), we obtain  $\mathbf{E}_{L_{i-1}, x^{(i)}} (u \cdot a)^2 = 1/(d-i+1)$ . Notice that by [Lemma B.1](#),  $\mathbf{E}_{L_{i-1}, x^{(i)}} \|(x^{(i)})_{L_{i-1}^\perp}\|^2 = (d-i+1)/d$ . This implies that  $\mathbf{E}_{X, \mathcal{A}} L(\mathcal{A}, X, w^*) \leq 1/2$ .  $\square$

### B.3 The Gain of [Algorithm 1](#)

In this section, we analyze the gain from ordering of [Algorithm 1](#). Our main goal is to prove [Proposition 4.1](#), which we restate as follows.

**Proposition B.4** ([Proposition 4.1](#)). *Let  $X$  be a set of  $n \geq \text{poly}(d)$  examples drawn i.i.d. from  $\mathbb{S}^d$  and let  $\mathcal{A}$  denote [Algorithm 1](#), then over the randomness of the dataset  $X$ , in expectation,  $\mathcal{G}(\mathcal{A}, X, \mathbb{S}^d)^{-1} \leq O(1/d + n^{-2/d})$ .*

We know that  $\min_{\mathcal{A}^{\text{random}}} \mathbf{E}_{X \sim D} \mathcal{L}(\mathcal{A}^{\text{random}}, X, \mathbb{S}^d) \in \Theta(1)$  from the last section. So, to analyze the gain of [Algorithm 1](#), the central question is to upper bound  $\mathcal{L}(\mathcal{A}, X, \mathbb{S}^d)$ . To do this, we need the following probability lemma.

**Lemma B.5.** *Let  $X_1, \dots, X_m$  be  $m$  independent random variable with distribution  $\text{Beta}(k/2, (d-k)/2)$ ,  $1 \leq k < d$ . Denote by  $Y = \min\{X_1, \dots, X_m\}$ . Then we have  $\mathbf{E} Y \leq O((m/\log m)^{-2/k} k/d)$ .*

*Proof of Lemma B.5.* We want to find some sufficient small  $\epsilon > 0$  such that  $\mathbf{E} Y \leq \epsilon$ . Notice that  $\mathbf{E} y \leq \mathbf{E} X_i \leq k/d$ . So we can without loss of generality assume  $\epsilon \leq k/d$ . To get such an upper bound for  $\mathbf{E} Y$ , it is sufficient to find some  $\epsilon > 0$  such that  $\Pr(Y \geq \epsilon/2) \leq \epsilon/2$  because for such  $\epsilon$ , we have

$$\mathbf{E} Y \leq \mathbf{E}(Y \mid Y \leq \epsilon/2) + \Pr(Y \geq \epsilon/2) \leq \epsilon.$$

In the rest of the proof, we show  $\epsilon = O((m/\log m)^{-2/k} k/d)$  satisfies such conditions by showing that such an  $\epsilon$  satisfies some cleaner sufficient conditions for  $\Pr(Y \geq \epsilon/2) \leq \epsilon/2$ .

We use the fact that  $\Pr(Y \geq y) = \Pr(X_i \geq y)^m = (1 - \Pr(X_i \leq y))^m \leq \exp(-m \Pr(X_i \leq y))$ . If  $\exp(-m \Pr(X_i \leq \epsilon/2)) \leq \epsilon/2$ , then such  $\epsilon$  satisfies  $\Pr(Y \geq \epsilon/2) \leq \epsilon/2$ . This is equivalent to find  $\epsilon$  such that

$$m \Pr(X_i \leq \epsilon/2) \geq \log(2/\epsilon). \quad (5)$$

We next lower bound  $\Pr(X_i \leq \epsilon/2)$ . By [Lemma B.1](#), We have

$$\begin{aligned} \Pr(X_i \leq \epsilon/2) &= B\left(\frac{k}{2}, \frac{d-k}{2}\right)^{-1} \int_0^{\frac{\epsilon}{2}} x^{\frac{k}{2}-1} (1-x)^{\frac{d-k}{2}-1} dx \\ &\geq B\left(\frac{k}{2}, \frac{d-k}{2}\right)^{-1} (1-\epsilon/2)^{\frac{d-k}{2}} \int_0^{\frac{\epsilon}{2}} x^{\frac{k}{2}-1} dx \\ &\geq \frac{2}{k} B\left(\frac{k}{2}, \frac{d-k}{2}\right)^{-1} \exp(-e\epsilon(d-k)/4) (\epsilon/2)^{k/2} \\ &\geq \frac{2}{k} B\left(\frac{k}{2}, \frac{d-k}{2}\right)^{-1} \exp(-ek(d-k)/4d) (\epsilon/2)^{k/2} \\ &\geq \frac{2}{k} B\left(\frac{k}{2}, \frac{d-k}{2}\right)^{-1} \exp(-ek/4) (\epsilon/2)^{k/2} \\ &= \frac{2}{k} \exp(-ek/4) (\epsilon/2)^{k/2} \frac{k(d-k)}{2d} \binom{d/2}{k/2} \\ &\geq \frac{d-k}{d} \exp(-ek/4) \left(\frac{d\epsilon}{2k}\right)^{k/2}. \end{aligned}$$

In the third inequality, we use the fact that  $\epsilon < k/d$ . To make (5) holds, we only need to find some  $\epsilon$  such that

$$\frac{m(d-k)}{d} \exp(-ek/4) \left(\frac{d\epsilon}{2k}\right)^{k/2} \geq \log(2/\epsilon).$$

That can be done by choosing some  $\epsilon = O((m/\log m)^{-2/k} k/d)$ .  $\square$

With [Lemma B.5](#), we are able to give the following upper bound for  $\mathcal{L}(\mathcal{A}, X, \mathbb{S}^d)$ .

**Lemma B.6.** *Let  $X$  be a set of  $n \geq \text{poly}(d)$  examples drawn i.i.d. from  $\mathbb{S}^d$  and let  $\mathcal{A}$  denote [Algorithm 1](#), then  $\mathbf{E}_X \mathcal{L}(\mathcal{A}, X, \mathbb{S}^d) \leq O(1/d + n^{-2/d})$ .*

*Proof of Lemma B.6.* We know that with probability 1,  $X$  is in general position. That is to say every  $d$  examples in  $X$  are linearly independent. So after seeing labels of  $d$  different examples, [Algorithm 1](#) learns  $w^*$  exactly by solving a system of linear equations. Thus, we only need to bound the loss of [Algorithm 1](#) on the first  $d$  examples. Use a similar approach as we did in the proof of [Lemma B.3](#). We have

$$\begin{aligned}
\mathbf{E}_{X, \mathcal{A}} \mathcal{L}(\mathcal{A}, X, w^*) &= \mathbf{E} \sum_{i=1}^d (y^{(i)} - \hat{y}^{(i)})^2 = \sum_{i=1}^d \mathbf{E}_{L_{i-1}, x^{(i)}} \left( (y^{(i)} - \hat{y}^{(i)})^2 \mid x^{(i)} \right) \\
&= \sum_{i=1}^d \mathbf{E}_{L_{i-1}, x^{(i)}} \left( (w_{L_{i-1}}^* \cdot x_i - w^* \cdot x_i)^2 \mid x^{(i)} \right) \\
&= \sum_{i=1}^d \mathbf{E}_{L_{i-1}, x^{(i)}} \left( (w_{L_{i-1}}^* \cdot x^{(i)})^2 \mid x^{(i)} \right) = \sum_{i=1}^d \mathbf{E}_{L_{i-1}, x^{(i)}} \left( \left( w_{L_{i-1}}^* \cdot (x^{(i)})_{L_{i-1}^\perp} \right)^2 \mid x^{(i)} \right) \\
&= \sum_{i=1}^d \mathbf{E}_{L_{i-1}, x^{(i)}} \left( \left\| w_{L_{i-1}}^* \right\|^2 \left\| (x^{(i)})_{L_{i-1}^\perp} \right\|^2 (u \cdot a)^2 \right) \\
&= \sum_{i=1}^d \mathbf{E}_{L_{i-1}, x^{(i)}} \left\| w_{L_{i-1}}^* \right\|^2 \mathbf{E}_{L_{i-1}, x^{(i)}} \left\| (x^{(i)})_{L_{i-1}^\perp} \right\|^2 \mathbf{E}_{L_{i-1}, x^{(i)}} (u \cdot a)^2 \\
&= \sum_{i=1}^d \frac{d-i+1}{d} \frac{1}{d-i+1} \mathbf{E}_{L_{i-1}, x^{(i)}} \left\| (x^{(i)})_{L_{i-1}^\perp} \right\|^2 = \frac{1}{d} \sum_{i=1}^d \mathbf{E}_{L_{i-1}, x^{(i)}} \left\| (x^{(i)})_{L_{i-1}^\perp} \right\|^2.
\end{aligned}$$

To bound the loss of [Algorithm 1](#), it remains to bound the  $\mathbf{E}_{L_{i-1}, x^{(i)}} \left\| (x^{(i)})_{L_{i-1}^\perp} \right\|^2$ , which is the minimum norm of the projection of  $n/(d-i)^2$  random points onto a  $d-i+1$  dimensional subspace for  $i > 1$ . By [Lemma B.5](#), we know that  $\mathbf{E}_{L_{i-1}, x^{(i)}} \left\| (x^{(i)})_{L_{i-1}^\perp} \right\|^2 \leq O((n/\log n)^{-2/(d-i)} \frac{d-i}{d}) \leq O((n/\log n)^{-2/d} \frac{d-i}{d})$ . Sum these inequalities together, we obtain that  $\mathbf{E}_{X, \mathcal{A}} \mathcal{L}(\mathcal{A}, X, w^*) \leq O(1/d + (n/\log n)^{-2/d})$ . We notice that if  $n > d^d$ , then  $(n/\log n)^{-2/d} \leq 1/d$  and if  $n \leq d^d$ ,  $(\log n)^{2/d} = O(1)$ . This implies that  $\mathbf{E}_{X, \mathcal{A}} \mathcal{L}(\mathcal{A}, X, w^*) \leq O(1/d + n^{-2/d})$ .  $\square$

With [Lemma B.6](#), we can obtain the proof of [Proposition 4.1](#) immediately.

*Proof of Proposition 4.1.* By [Lemma B.2](#), we know that  $\min_{\mathcal{A}^{\text{random}}} \mathbf{E}_{X \sim D} \mathcal{L}(\mathcal{A}^{\text{random}}, X, \mathbb{S}^d) \in \Omega(1)$ . By [Lemma B.6](#), we know that  $\mathbf{E}_X \mathcal{L}(\mathcal{A}, X, \mathbb{S}^d) = \mathbf{E}_{w^* \sim \mathbb{S}^d} \mathbf{E}_{X, \mathcal{A}} \mathcal{L}(\mathcal{A}, X, w^*) \leq O(1/d + n^{-2/d})$ . Thus, we have in expectation,  $\mathcal{G}^{-1}(\mathcal{A}, X, \mathbb{S}^d) \leq O(1/d + n^{-2/d})$ .  $\square$

In particular, we remark that with a simple application of Markov inequality, [Lemma B.6](#) actually implies  $\mathcal{G}^{-1}(\mathcal{A}, X) \leq O(1/d + n^{-2/d})$ , since [Lemma B.6](#) holds for arbitrary  $w^*$ .

#### B.4 The Gain of the Best Learner

In this subsection, we analyze the gain of the best learner and prove [Proposition 4.2](#).

**Proposition B.7 (Proposition 4.2).** *Let  $X \subseteq S^d$  be a set of  $n > \text{poly}(d)$  examples drawn iid from  $\mathbb{S}^d$ . For every  $\delta \in (3/n, 1)$ , with probability at least 99%,  $\mathcal{G}^*(X, \mathbb{S}^d)^{-1} \geq \Omega(1/d + \delta n^{-(2+2\delta)/d})$ .*

By [Lemma B.3](#), we know that  $\min_{\mathcal{A}^{\text{random}}} \mathbb{E}_{X \sim D} \mathcal{L}(\mathcal{A}^{\text{random}}, X, \mathbb{S}^d) \leq O(1)$ . So in the rest of this section, we will focus on the cost of the best learner over a random set of examples  $X$ . Our central result is the following information-theoretic lower bound.

**Lemma B.8.** *Let  $X \subseteq \mathbb{S}^d$  be a set of  $n > \text{poly}(d)$  examples drawn iid from  $\mathbb{S}^d$ . For every  $\delta \in (3/n, 1)$ , with probability at least 99%,  $X$  satisfies, for every self-directed learner  $\mathcal{A}$ ,  $\mathcal{L}(\mathcal{A}, X, \mathbb{S}^d) \geq \Omega(1/d + \delta n^{-(2+2\delta)/d})$ .*

*Proof of Proposition 4.2.* According to [Lemma A.3](#), the best learner  $\mathcal{A}^*$  to learn  $w^* \sim \mathbb{S}^d$  is the one that selects a sequence of examples with minimum spanning cost and makes the Bayesian optimal prediction. Let  $\sigma^*$  be the sequence of examples of  $X$  with the minimum spanning cost. Then we know that  $\mathcal{L}(\mathcal{A}^*, X, \mathbb{S}^d) = C(\sigma^*, m)/d$ . So in the rest of the proof, we will show that with 99%, there is no sequence of examples with a very small spanning cost. We will first show that for a fixed permutation of the  $n$  random examples, the probability that the sequence has a very small spanning cost is small, then we will apply a union bound to finish the proof.

We consider the random variable  $Y$  defined as follows. Let  $V$  be a fixed subspace with dimension  $k \geq d/2$ , and let  $x$  be a uniform vector over  $\mathbb{S}^{d-1}$ . Denote by  $Y = \|x_V\|^2$ . By [Lemma B.1](#), we know that  $Y \sim \text{Beta}(k/2, (d-k)/2)$ . We show that with a very high probability  $Y$  is large. We have for every  $\epsilon \in (0, 1)$ ,

$$\begin{aligned} \Pr(Y \leq \epsilon) &= B\left(\frac{k}{2}, \frac{d-k}{2}\right)^{-1} \int_0^\epsilon x^{\frac{k}{2}-1} (1-x)^{\frac{d-k}{2}-1} dx \\ &\leq \int_0^\epsilon x^{\frac{k}{2}-1} (1-x)^{\frac{d-k}{2}-1} dx \frac{k(d-k)}{2d} \left(\frac{ed}{k}\right)^{k/2} \\ &\leq (ed/k)^{k/2} (k/2d) \epsilon^{k/2} \leq (ed/k)^{k/2} \epsilon^{k/2}. \end{aligned}$$

We set up  $\epsilon = \frac{k}{2ed} n^{-(2+2\delta)/k}$ , then we obtain that with probability at most  $n^{-(1+\delta)}/2$ ,

$$Y \leq \epsilon \leq \frac{k}{ed} n^{-(2+2\delta)/k} \leq n^{-(2+2\delta)/k} / 2.$$

Now, we fix a permutation  $\sigma$  of the  $n$  random examples. Without loss of generality, we assume this sequence is  $x^{(1)}, \dots, x^{(n)}$ . We will show a slightly stronger statement that  $C(\sigma, d/2)$  is large with an extremely high probability.

Now assume that the spanning cost of this sequence  $x^{(1)}, \dots, x^{(d/2)}$  is small, say,  $\sum_{i=2}^{d/2} \left\| (x^{(i)})_{L_{i-1}^\perp} \right\|^2 \leq \delta d n^{-(2+2\delta)/k} / 12$ . This implies that at most  $\delta d / 6$  terms of the first  $d/2$  terms can be larger than  $n^{-(2+2\delta)/d} / 2$ . Notice that since  $x^{(1)}, \dots, x^{(d/2)}$  are independent for a fixed permutation, we obtain that

$$\begin{aligned} \Pr\left(\sum_{i=2}^{d/2} \left\| (x^{(i)})_{L_{i-1}^\perp} \right\|^2 \leq \delta d n^{-(2+2\delta)/k} / 12\right) &\leq \left(\frac{1}{2}\right)^{(1-\delta/6)d} n^{-\frac{(1+\delta)(1-\delta/6)d}{2}} \left(\frac{d/2}{\delta d/6}\right) \\ &\leq 0.99 n^{-\frac{(1+\delta)(1-\delta/6)d}{2}} (3/\delta)^{\delta d/6} \\ &\leq 0.99 n^{-\frac{(1+\delta)(1-\delta/6)d}{2} + \frac{\delta d}{6}} \leq 0.99 n^{-d/2}. \end{aligned}$$

In the third inequality, we use the fact that  $3/\delta \leq n$ , and in the last inequality we use the fact that  $\delta < 1$ . Since there are at most  $n^{d/2}$  such permutations for the first  $d/2$  terms, by union bound, we obtain that with probability 0.99 every sequence of examples has a spanning cost at least  $\Omega(1 + \delta d n^{-(2+2\delta)/d})$ , where the constant term comes from the spanning cost of the first term. This implies that for every self-directed learner  $\mathcal{A}$ ,  $\mathcal{L}(\mathcal{A}, X, \mathbb{S}^d) \geq \Omega(1/d + \delta n^{-(2+2\delta)/d})$ . □

With [Lemma B.8](#), we are able to obtain the proof of [Proposition 4.2](#) immediately.

*Proof.* By [Lemma B.3](#), we know that  $\min_{\mathcal{A}^{\text{random}}} \mathbf{E}_{X \sim D} \mathcal{L}(\mathcal{A}^{\text{random}}, X, \mathbb{S}^d) \leq O(1)$  and by [Lemma B.8](#), we know that with probability at least 99%, for every learner  $\mathcal{A}$ ,  $\mathcal{L}(\mathcal{A}, X, \mathbb{S}^d) \geq \Omega(1/d + \delta n^{-(2+2\delta)/d})$ . This implies that  $\mathcal{G}^*(X, \mathbb{S}^d)^{-1} \geq \Omega(1/d + \delta n^{-(2+2\delta)/d})$  with probability at least 99%.  $\square$

We remark that a direct implication of [Lemma B.8](#) is that for every learner  $\mathcal{A}$ , there is some  $w^*$  such that with probability at least 99%, the learning cost  $L(\mathcal{A}, X, w^*)$  is at least  $\Omega(1/d + \delta n^{-(2+2\delta)/d})$ , which means  $\mathcal{G}^*(X) \geq \Omega(1/d + \delta n^{-(2+2\delta)/d})$ .

## C Missing Proofs from [Section 5](#)

In this section, we analyze the performance of [Algorithm 2](#) for the self-directed ReLU regression problem and present the proof of [Theorem 5.1](#) in this section.

**Theorem C.1.** *Let  $X \subseteq \mathbb{R}^d$  be a set of  $n \geq \text{poly}(d)$  examples drawn i.i.d. from  $\mathbb{S}^d$ . Let  $\mathcal{G}(\mathcal{A}, X)$  be the gain from ordering of [Algorithm 2](#) for the self-directed ReLU regression problem over  $X$ . Then,*

$$\mathcal{G}(\mathcal{A}, X)^{-1} \leq O\left(\frac{1}{d}\right) + \begin{cases} \min\left\{O\left(\frac{\tan^2 \theta_0 \log d}{d}\right), O\left(\frac{\log d}{n^{2/d}}\right)\right\} & \text{if } \frac{n\theta_0}{4\pi d \log d} > \exp\left(\frac{d}{8}\right), \\ \min\left\{O\left(\frac{\tan^2 \theta_0 \log d}{\log(n\theta_0)}\right), O\left(\frac{\log d}{n^{2/d}}\right)\right\} & \text{if } 1 \leq \frac{n\theta_0}{4\pi d \log d} \leq \exp\left(\frac{d}{8}\right) \\ O\left(\frac{1}{n}\right) & \text{if } \frac{n\theta_0}{4\pi d \log d} < 1. \end{cases}$$

### C.1 ReLU Regression with A Random Order

We start with an information-theoretic lower bound for the cost of a learner that uses a random order.

**Lemma C.2.** *Let  $w^* \in \mathbb{R}^d$  be a target vector drawn uniformly from  $\mathbb{S}^d$ . Let  $X$  be a set of  $n > d$  examples drawn i.i.d. from  $\mathbb{S}^d$ . Let  $\mathcal{A}$  be any learning algorithm for the ReLU regression problem over  $X$  that uses a random order to learn  $w^*$ . For a random set of examples, let the random variable  $\mathcal{L}(\mathcal{A}, X, \mathbb{S}^d)$  be the expected learning cost of  $\mathcal{A}$ . Then we have  $\mathbf{E}_X \mathcal{L}(\mathcal{A}, X, \mathbb{S}^d) \geq \Omega(1)$ .*

*Proof of Lemma C.2.* Assume a self-directed learner  $\mathcal{A}$  learns  $w^*$  with a random sequence of examples  $x^{(1)}, \dots, x^{(n)}$ . To lower bound the learning cost of  $\mathcal{A}$ , we slightly relax the learning model so that in each round  $\mathcal{A}$  not only sees  $\text{Relu}(w^* \cdot x^{(i)})$  but also sees  $w^* \cdot x^{(i)}$ . In the relaxed learning model,  $w_{L_{i-1}}^*$  is known at the beginning of each round. We say an example  $x^{(i)}$  is good if  $w_{L_{i-1}}^* \cdot x^{(i)} \geq 0$  and  $w_{L_{i-1}}^* \cdot x^{(i)} \geq 0$ . If  $x^{(i)}$  is not good, then we say it is a bad example. Notice that by symmetry, in each round with probability 1/4, we will get a good example. Let  $y^{(i)}$  be the true label of  $x^{(i)}$  and let  $\hat{y}^{(i)}$  be the prediction for  $x^{(i)}$ . Consider a single learning round, we have

$$\begin{aligned} \mathbf{E}(y^{(i)} - \hat{y}^{(i)})^2 &= \Pr(x^{(i)} \text{ is good}) \mathbf{E}\left((y^{(i)} - \hat{y}^{(i)})^2 \mid x^{(i)} \text{ is good}\right) + \Pr(x^{(i)} \text{ is bad}) \mathbf{E}\left((y^{(i)} - \hat{y}^{(i)})^2 \mid x^{(i)} \text{ is bad}\right) \\ &\geq \frac{1}{4} \mathbf{E}\left((y^{(i)} - \hat{y}^{(i)})^2 \mid x^{(i)} \text{ is good}\right) \\ &= \frac{1}{4} \mathbf{E}_{L_{i-1}, a_{i-1}, x^{(i)}} \left( (\hat{y}_i - a_{i-1} \cdot x^{(i)} - w_{L_{i-1}}^* \cdot x^{(i)})^2 \mid x^{(i)} \text{ is good}, w_{L_{i-1}}^* = a_{i-1}, x^{(i)} \right) \\ &= \frac{1}{4} \mathbf{E}_{L_{i-1}, a_{i-1}, x_i} \left( (\hat{p}_i - w_{L_{i-1}}^* \cdot x^{(i)})^2 \mid x^{(i)} \text{ is good}, w_{L_{i-1}}^* = a_{i-1}, x^{(i)} \right) \\ &\geq \frac{1}{4} \text{Var} \left( (w_{L_{i-1}}^* \cdot x^{(i)}) \mid x^{(i)} \text{ is good}, w_{L_{i-1}}^* = a_{i-1}, x^{(i)} \right) \\ &= \frac{1}{4} \text{Var} \left( (w_{L_{i-1}}^* \cdot (x^{(i)})_{L_{i-1}}^\perp) \mid x^{(i)} \text{ is good}, w_{L_{i-1}}^* = a_{i-1}, x^{(i)} \right) \\ &= \frac{1}{4} \frac{d-i+1}{d} \frac{d-i+1}{d} \text{Var} \left( \left( \frac{w_{L_{i-1}}^*}{\|w_{L_{i-1}}^*\|} \cdot \frac{(x^{(i)})_{L_{i-1}}^\perp}{\|(x^{(i)})_{L_{i-1}}^\perp\|} \right) \mid x^{(i)} \text{ is good}, w_{L_{i-1}}^* = a_{i-1}, x^{(i)} \right) \\ &\geq \Omega\left(\frac{d-i+1}{d^2}\right). \end{aligned}$$

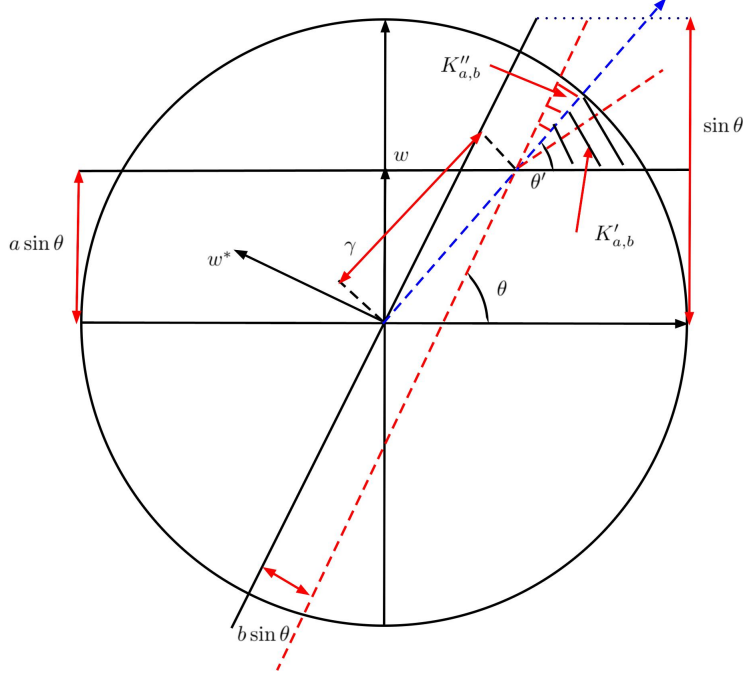

Figure 1: Geometry illustration for [Lemma 5.2](#).  $K''_{a,b}$  is the red shadowed area and  $K'_{a,b}$  is the black shadowed area. As  $a/\gamma$  increases,  $\theta' = \arcsin(a \sin \theta / \gamma) > \theta/2$  and  $M(K''_{a,b}) \subseteq K'_{a,b}$ .

Here in the third equality, we denote by  $\hat{p}_i = \hat{y}^{(i)} - a_{i-1} \cdot x^{(i)}$ . This implies that  $\mathbf{E}_X \mathcal{L}(\mathcal{A}, X, \mathbb{S}^d) = \sum_{i=1}^d \mathbf{E}(y^{(i)} - \hat{y}^{(i)})^2 = \Omega(1)$ .

□

[Lemma C.2](#) implies that for every  $\mathcal{A}^{\text{random}}$ , there is some  $w^*$  such that  $\mathbf{E}_X L(\mathcal{A}, X, w^*) = \Omega(1)$ . Thus,  $\min_{\mathcal{A}^{\text{random}}} \max_{w^*} \mathbf{E}_X L(\mathcal{A}^{\text{random}}, X, w^*) \in \Omega(1)$ .

## C.2 Geometric Technical Lemma

As [Lemma C.2](#) suggests, to analyze the gain of [Algorithm 2](#), we only need to analyze the learning cost of [Algorithm 2](#). The central technique we use is the following geometric technical lemma. At a high lever, it bounds by above the probability that a point far away from some guess  $w$  is also far away from the ground-truth vector  $w^*$ . We define by  $K_a := \{x \in C \mid w \cdot x \geq a \sin \theta\}$  the set of points that are far away from the guess  $w$  (large-margin points) and by  $K_{a,b} := \{x \in C \mid w \cdot x \geq a \sin \theta, w^* \cdot x \leq -b \sin \theta\}$  the subset of  $K_a$  that contains points that are far from  $w^*$  (large-margin with respect to  $w^*$ ). We show that conditional on  $K_a$  the probability that  $x \in K_{a,b}$  decays exponentially fast as a function of the margin  $b$ , i.e.,  $\Pr(x \in K_{a,b} \mid x \in K_a) \leq \exp(-O(db^2 + 2ab \cos \theta))$ . This means that with very high probability all points in  $K_a$  will land “close” to the target-vector  $w^*$ .

**Lemma C.3 (Lemma 5.2).** *Let  $w^* \in S^d$  be a target vector and let  $w \in S^d$  be an arbitrary vector such that  $\theta = \theta(w^*, w) < \pi/2$ . Denote by  $C = \{x \in S^d \mid w^* \cdot x \leq 0, w \cdot x \geq 0\}$ . For every  $a, b \in (0, 1)$ , denote by  $K_a := \{x \in C \mid w \cdot x \geq a \sin \theta\}$  and  $K_{a,b} := \{x \in C \mid w \cdot x \geq a \sin \theta, w^* \cdot x \leq -b \sin \theta\}$ . Let  $x$  be a point uniformly drawn from  $S^d$ . There is some absolute constant  $c > 1$  such that if  $a/b \geq c$  then  $\Pr(x \in K_{a,b} \mid x \in K_a) \leq 2 \exp\left(-\frac{d}{3(1-a^2)}(b^2 + 2ab \cos \theta)\right)$ .*

*Proof of Lemma 5.2.* Without loss of generality, we assume that  $w = e_2$  and  $w^* = -\sin \theta e_1 + \cos \theta e_2$ , where  $e_1, e_2$  are the first two standard basis of  $\mathbb{R}^d$ . We consider the projection of  $x$  onto the 2-dimensional subspace spanned by  $w, w^*$ . We use a polar coordinate to write such a projection as

$r \cos \phi e_1 + r \sin \phi e_2$ . In this way, we obtain that

$$\begin{aligned} C &= \{(r, \phi) \mid r \in (0, 1), \phi \in (0, \theta)\}, \\ K_a &= \{(r, \phi) \mid r \sin \phi \geq a \sin \theta, r \in (0, 1), \phi \in (0, \theta)\}, \\ K_{a,b} &= \{(r, \phi) \mid r \sin(\phi - \theta) \geq -b \sin \theta, r \in (0, 1), \phi \in (0, \theta)\}. \end{aligned}$$

We partition  $K_{a,b}$  into two parts. (See [Figure 1](#) for detail.) Let  $\gamma^2 = a^2 + b^2 + 2ab \cos \theta$ . Denote by  $K'_{a,b} := \{(r, \phi) \in K_{a,b} \mid \sin \phi \in [a \sin \theta, a \sin \theta / \gamma]\}$  and  $K''_{a,b} = \{(r, \phi) \in K_{a,b} \mid \sin \phi \in [a \sin \theta / \gamma, (\sqrt{1 - (b \sin \theta)^2} - b \cos \theta) \sin \theta]\}$ . We mirror  $K''_{a,b}$  according to ray  $\{(r, \phi) \mid \sin \phi = a \sin \theta / \gamma\}$  and obtain a mirror set  $M(K''_{a,b})$ . We notice that when  $a/b > c$  for some constant  $c > 0$ ,  $a/\gamma > 1/\sqrt{2}$  and  $\sin \theta' = a \sin \theta / \gamma \geq \sin(\theta/2)$ . This implies  $M(K''_{a,b}) \subseteq K'_{a,b}$ . By symmetry, we obtain that  $\Pr(x \in K''_{a,b}) \leq \Pr(x \in K'_{a,b})$  when this happens. Since  $K_{a,b} \subseteq K_a$ , we have

$$\Pr(x \in K_{a,b} \mid x \in K_a) \leq 2 \Pr(x \in K'_{a,b} \mid x \in K_a).$$

In the rest of the proof, we will show  $\Pr(x \in K'_{a,b} \mid x \in K_a) \leq \exp\left(-\frac{d}{2(1-a^2)}(b^2 + 2ab \cos \theta)\right)$

By [Lemma B.1](#), recall the density function of  $r$  is  $f(r) = \frac{d-2}{2\pi}(1-r^2)^{d/2-2}r$ . Furthermore,  $\phi \sim U[0, 2\pi]$ . This implies that

$$\begin{aligned} \Pr(x \in K_a) &= \frac{d-2}{(2\pi)^2} \int_{\arcsin(a \sin \theta)}^{\theta} \int_{\frac{a \sin \theta}{\sin \phi}}^1 (1-r^2)^{d/2-2} r dr d\phi \\ &= \frac{1}{(2\pi)^2} \int_{\arcsin(a \sin \theta)}^{\theta} \left(1 - \left(\frac{a \sin \theta}{\sin \phi}\right)^2\right)^{d/2-1} d\phi. \\ \Pr(x \in K'_{a,b}) &= \frac{d-2}{(2\pi)^2} \int_{\arcsin(a \sin \theta)}^{\arcsin(a \sin \theta / \gamma)} \int_{\frac{a \sin \theta}{\sin \phi}}^1 (1-r^2)^{d/2-2} r dr d\phi \\ &= \frac{1}{(2\pi)^2} \int_{\arcsin(a \sin \theta)}^{\arcsin(a \sin \theta / \gamma)} \left(1 - \left(\frac{a \sin \theta}{\sin \phi}\right)^2\right)^{d/2-1} d\phi. \end{aligned}$$

To simplify the notation, we introduce the following function

$$g(t) = \frac{1}{(2\pi)^2} \int_{\arcsin(a \sin \theta)}^{\arcsin(a \sin \theta / t)} \left(1 - \left(\frac{a \sin \theta}{\sin \phi}\right)^2\right)^{d/2-1} d\phi, \quad t \in [a, 1].$$

Then we have We are interested in the upper bound for  $g(\gamma)/g(a)$ . To do this, we upper bound

$$\log(g(\gamma)/g(a)) = (\log g(t))'(\gamma - a).$$

for some  $t \in [a, \gamma]$ . Now we derive an upper bound for  $\log g(t)$ . Notice that

$$g'(t) = -\frac{1}{(2\pi)^2} \frac{a \sin \theta (1-t^2)^{d/2-1}}{t^2 \sqrt{1 - \left(\frac{a \sin \theta}{t}\right)^2}} = -\frac{1}{(2\pi)^2} \frac{a \sin \theta (1-t^2)^{d/2-1}}{t \sqrt{t^2 - (a \sin \theta)^2}}.$$

On the other hand, we have  $\Pr(x \in K'_{a,b} \mid x \in K_a) = g(\gamma)/g(a)$ .

$$\begin{aligned} g(t) &= \frac{1}{(2\pi)^2} \int_{\arcsin(a \sin \theta)}^{\arcsin(a \sin \theta / t)} \left(1 - \left(\frac{a \sin \theta}{\sin \phi}\right)^2\right)^{d/2-1} d\phi \\ &= \frac{1}{(2\pi)^2} \int_t^1 (1-s^2)^{d/2-1} \frac{a \sin \theta}{s \sqrt{s^2 - (a \sin \theta)^2}} ds \\ &\leq \frac{1}{(2\pi)^2} \int_t^1 s(1-s^2)^{d/2-1} ds \frac{a \sin \theta}{t^2 \sqrt{t^2 - (a \sin \theta)^2}} \\ &= \frac{(1-t^2)^{d/2} a \sin \theta}{(2\pi)^2 dt^2 \sqrt{t^2 - (a \sin \theta)^2}}. \end{aligned}$$

We have

$$(\log g(t))' = \frac{g'(t)}{g(t)} \leq -dt(1-t^2)^{-1} \leq -da(1-a^2)^{-1}.$$

So, we obtain that

$$\log \left( \frac{g(\gamma)}{g(a)} \right) \leq -da(1-a^2)^{-1}(\gamma-a) = -\frac{da(\gamma^2-a^2)}{(\gamma+a)} \leq -\frac{d(\gamma^2-a^2)}{3} = -\frac{d(b^2+2ab\cos\theta)}{3}.$$

Here, the second inequality holds because  $\gamma = \sqrt{a^2+b^2+2ab\cos\theta} \leq 2a$ . Thus, we get  $\Pr(x \in K'_{a,b} \mid x \in K_a) \leq \exp(-\frac{d(\gamma^2-a^2)}{3}) = \exp(-\frac{d(b^2+2ab\cos\theta)}{3})$ . Put everything together, we obtain that  $\Pr(x \in K_{a,b} \mid x \in K_a) \leq 2 \exp\left(-\frac{d}{3(1-a^2)}(b^2+2ab\cos\theta)\right)$ .  $\square$

We briefly explain how we will make use of this lemma. In [Lemma 5.2](#),  $w^*$  can be understood as the target vector and  $w$  can be understood as our current hypothesis  $w^{(i)}$  used in [Algorithm 2](#).  $\Pr(x \in K_{a,b} \mid x \in K_a)$  can be understood as if the margin  $w^{(i)} \cdot x$  is large, then with high probability, the learner's cost  $(w^* \cdot x)^2$  must be small.

Next, we will make use of the “maximum margin” lemma used in [\[DKTZ23\]](#) to show that the example we selected actually has a large margin.

**Lemma C.4** (Maximum Margin (Proposition 21 in [\[DKTZ23\]](#))). *Let  $v, u \in \mathbb{R}^d$  be unit vectors such with angle  $\theta(u, v) = \theta$ . Let  $C = \{x \in S^d \mid v \cdot x \leq 0, u \cdot x \geq 0\}$ . Let  $x^{(1)}, \dots, x^{(n)}$  be  $n$  i.i.d. examples drawn uniformly from  $S^d$ . Then*

1. *For all  $n, s \geq 1$  and  $c \geq 2$  such that  $\exp(-dc/4) \leq 4\pi s/(n\theta) \leq 1$ ,*

$$\Pr \left( \max_{i \in [n]} (u \cdot x \mathbf{1}_{\{x^{(i)} \in C\}}) \leq \sqrt{\frac{\log((n\theta/4\pi s))}{2cd}} \sin \theta \right) \leq 2 \exp(-2s).$$

2. *For all  $n, s \geq 1$  such that  $4\pi s/n\theta \leq 1$ ,*

$$\Pr \left( \max_{i \in [n]} (u \cdot x \mathbf{1}_{\{x^{(i)} \in C\}}) \leq \left(1 - \left(\frac{4\pi s}{n\theta}\right)^{2/d}\right) \sin \theta \right) \leq 2 \exp(-2s).$$

### C.3 Proof of [Theorem 5.1](#)

Now we are able to prove [Theorem 5.1](#).

*Proof of [Theorem 5.1](#).* We notice that if  $(x^{(0)}, y^{(0)}) = (0, 0)$ , then with probability at least 99%, the first time we see a positive example, we will select some example  $x^{(1)} \in S^d$  such that  $0 \leq w^* \cdot x^{(1)} \leq O(1/d)$ . This implies that we will pay  $O(1/d)$  to get a pair of example  $(x^{(1)}, y^{(1)})$  such that  $\theta(x^{(1)}, w^*) \leq \theta_0 = \pi/2$ . So it sufficient to deal with the case where  $(x^{(0)}, y^{(0)}) \neq (0, 0)$ . In this case, for every  $i \in [d]$ , we use random variable  $c_i$  to denote the cost of [Algorithm 2](#) for predicting labels of examples in  $X_i$ . Let  $\theta_i = \theta(w^{(i)}, w^*)$  and  $C_i := \{x \in X_i \mid w^{(i)} \cdot x \leq 0, w^* \cdot x \geq 0\}$ . We say [Algorithm 2](#) makes a mistake at some example  $x$  if  $\text{Relu}(w^{(i)} \cdot x) \neq \text{Relu}(w^* \cdot x)$ . We will derive a high probability bound for each  $c_i$ , then the total learning cost is  $\sum_{i=1}^d c_i$  since after seeing  $d$  positive examples, we are able to solve a linear equation to get  $w^*$  exactly. We consider three cases here.

**Case 1:**  $\theta_i \leq \frac{4\pi d \log d}{n}$ . In this case, our current hypothesis  $w^{(i)}$  is very close to the target  $w^*$ . In this case, we have to consider two different situations. In the first situation, there is at least one example  $x \in C_i$ . Since [Algorithm 2](#) keeps selecting example  $x$  that minimizes  $w^{(i)} \cdot x$ , once we make a mistake, we must make a mistake at some example  $x \in C_i$  by paying  $(w^* \cdot x)^2 \leq \sin^2 \theta_i$ . In the second situation, there is no example  $x \in C_i$ . Let  $C'_i = \{x \in S^d \mid -x \in C_i\}$ . By symmetry, we know that with probability at least  $1 - 1/\text{poly}(d)$ , there are at most  $O(\log d)$  examples in  $C'_i$ .

Since there is no example in  $C_i$ , **Algorithm 2** will make a mistake at examples  $x$  such that  $w^* \cdot x \geq 0$  and will stop making mistakes at some example  $x$  such that  $w^* \cdot x > 0$ . When we make a mistake at an example  $x \in C'_i$ , we pay  $(w^{(i)} \cdot x)^2 \leq \sin^2 \theta_i$ . Since there are at most  $O(\log d)$  examples in  $C'_i$ , we will pay at most  $O(\log d \sin^2 \theta_i)$  for examples in  $C'_i$ . When we make a mistake at a positive example  $x$ , we pay  $(w^{(i)} \cdot x - w^* \cdot x)^2 = (w_{L_{i-1}}^* \cdot x)^2 \leq \sin^2 \theta_i$ . In summary, with probability at least  $1 - 1/\text{poly}(d)$ , we have  $c_i \leq O(\log d) \sin^2 \theta_i \leq O(\frac{d^2 \log^3 d}{n^3}) \leq 1/(dn)$  since we assume that  $n \geq \text{poly}(d)$ .

**Case 2:**  $1 \leq \frac{n\theta_i}{4\pi d \log d} \leq \exp(\frac{d}{8})$ . Since each example is drawn i.i.d. from  $\mathbb{S}^d$  and  $X_i$  is a random subset of them, we obtained that with probability  $1 - 1/\text{poly}(d)$ , there must be at least one example  $x \in C_i$  and **Algorithm 2** will make its mistake at some example  $x \in C_i$ . Since **Algorithm 2** always selects the example  $x$  that minimize  $w^{(i)} \cdot x$ , we must make a mistake for an example  $x \in \text{argmin}_{x' \in C_i} w^{(i)} \cdot x'$  and pay  $(w^* \cdot x)^2$ . Now let  $x \in \text{argmin}_{x' \in C_i} w^{(i)} \cdot x'$  be the example where **Algorithm 2** makes a mistake. Assume  $w^{(i)} \cdot x = -a \sin \theta_i$  and  $w^* \cdot x = b \sin \theta_i$ , then our cost in this round is  $b^2 \sin^2 \theta_i$ . Denote by  $K_a := \{x \in C_i \mid w^{(i)} \cdot x \leq -a \sin \theta_i\}$  and  $K_{a,b} = \{x \in C_i \mid w^{(i)} \cdot x \leq -a \sin \theta_i, w^* \cdot x \geq b \sin \theta_i\}$ . We want to show that given  $w^{(i)} \cdot x$  is negative enough, with high probability,  $b$  cannot be too large. By **Lemma 5.2**, this is

$$\Pr(x \in K_{a,b} \mid x \in K_a) \leq 2 \exp\left(-\frac{d}{3(1-a^2)}(b^2 + 2ab \cos \theta)\right). \quad (6)$$

To derive a high probability bound for  $b$ , it remains to understand how large  $a$  could be. Denote by  $m = n/d$ , which is the number of examples in  $X_i$ . Since  $1 \leq \frac{m\theta_i}{4\pi \log d} \leq \exp(\frac{d}{8})$ , by **Lemma C.4**, we obtain that with probability at least  $1 - 1/\text{poly}(d)$ ,

$$w^{(i)} \cdot x \leq -\sqrt{\frac{\log((m\theta_i/4\pi \log d))}{4d}} \sin \theta_i.$$

Since  $1 \leq \frac{m\theta_i}{4\pi \log d}$ , again, by **Lemma C.4**, we obtain that with probability at least  $1 - 1/\text{poly}(d)$ , we have

$$w^{(i)} \cdot x \leq -\left(1 - \left(\frac{4\pi \log d}{m\theta_i}\right)^{2/d}\right) \sin \theta_i.$$

This is to say, with probability at least  $1 - 1/\text{poly}(d)$ , we have  $w^{(i)} \cdot x \leq \min\{-\sqrt{\frac{\log((m\theta_i/4\pi \log d))}{4d}} \sin \theta_i, -\left(1 - \left(\frac{4\pi \log d}{m\theta_i}\right)^{2/d}\right) \sin \theta_i\}$ . Now we are able to derive the bound of  $c_i$ . Apply (6) with  $a = \sqrt{\frac{\log((m\theta_i/4\pi \log d))}{4d}}$  and  $b = \sqrt{\frac{16 \log^2 d}{d \cos^2 \theta_i \log(m\theta_i/4\pi \log d)}}$  we have

$$\Pr(x \in K_{a,b} \mid x \in K_a) \leq 2 \exp\left(-\frac{2dab \cos \theta_i}{3}\right) \leq 1/\text{poly}(d).$$

On the other hand, apply (6) with  $a = 1 - \left(\frac{4\pi \log d}{m\theta_i}\right)^{2/d}$  and  $b = \sqrt{\frac{\log d}{d} \left(\frac{4\pi \log d}{m\theta_i}\right)^{2/d}}$  we have

$$\Pr(x \in K_{a,b} \mid x \in K_a) \leq 2 \exp\left(-\frac{2db^2}{3(1-a^2)}\right) \leq 1/\text{poly}(d).$$

Combine these two bounds together, we obtain that with probability at least  $1 - 1/\text{poly}(d)$ ,  $c_i \leq \min\left\{\frac{16 \log^2 d}{d \cos^2 \theta_i \log(m\theta_i/4\pi \log d)} \sin^2 \theta_i, \frac{\log d}{d} \left(\frac{4\pi \log d}{m}\right)^{2/d}\right\} = \min\left\{O\left(\frac{\tan^2 \theta_i \log d}{d \log(n\theta_i)}\right), O\left(\frac{\log d}{dn^{2/d}}\right)\right\}$ .

**Case 3:**  $\frac{n\theta_i}{4\pi d \log d} > \exp(\frac{d}{8})$ . This case is similar to Case 2. We know that with probability  $1 - 1/\text{poly}(d)$  there must be at least 1 example in  $C_i$  and we will make a mistake at that example. Since  $1 \leq \frac{m\theta_i}{4\pi \log d}$ , by **Lemma C.4**, we have  $w^{(i)} \cdot x \leq -\left(1 - \left(\frac{4\pi \log d}{m\theta_i}\right)^{2/d}\right) \sin \theta_i$ . The slightly tricky part is that since  $\frac{m\theta_i}{4\pi \log d} > \exp(\frac{d}{8})$ , we are not able to apply the first case of **Lemma C.4**. However, if we sample  $m'$  examples from  $X_i$  such that  $\frac{m'\theta_i}{4\pi \log d} = \exp(\frac{d}{8})$  and consider the examples among the sampled points in  $C_i$ , then we are able to apply the first case of **Lemma C.4**. We will get

with probability at least  $1 - 1/\text{poly}(d)$ ,  $w^{(i)} \cdot x \leq -\sqrt{\frac{1}{32}} \sin \theta_i$ . Now apply [Lemma 5.2](#), we know that with probability at least  $1 - 1/\text{poly}(d)$ ,  $c_i \leq \min\{O(\frac{\tan^2 \theta_i \log d}{d^2}), O(\frac{\log d}{dn^{2/d}})\}$ . In summary, if we define

$$f(\theta) = \begin{cases} \min\{O(\frac{\tan^2 \theta \log d}{d^2}), O(\frac{\log d}{dn^{2/d}})\} & \text{if } \frac{n\theta}{4\pi d \log d} > \exp(\frac{d}{8}), \\ \min\{O(\frac{\tan^2 \theta \log d}{d \log(n\theta)}), O(\frac{\log d}{dn^{2/d}})\} & \text{if } 1 \leq \frac{n\theta}{4\pi d \log d} \leq \exp(\frac{d}{8}) \\ O(\frac{1}{dn}) & \text{if } \frac{n\theta}{4\pi d \log d} < 1, \end{cases}$$

then for each  $i \in [d]$ , with probability at least  $1 - 1/\text{poly}(d)$ ,  $c_i \leq f(\theta_i)$ . We notice that  $\cos \theta_i = \frac{w^{(i)} \cdot w^*}{\|w^{(i)}\| \|w^*\|} = \frac{\|w_{L_{i-1}}^*\|}{\|w^*\|}$ , which implies that  $\theta_i$  is decreasing in each round. Also, it is not hard to check as  $\theta_i$  decreasing the cost bound  $f(\theta_i)$  is also decreasing in each round. This implies that with probability at least  $1 - 1/\text{poly}(d)$ , we have  $\sum_{i=1}^d c_i \leq df(\theta_0)$ . Combine with the cost for initialization, we have

$$\mathcal{L}(\mathcal{A}, X) \leq O(\frac{1}{d}) + \begin{cases} \min\{O(\frac{\tan^2 \theta_0 \log d}{d^2}), O(\frac{\log d}{n^{2/d}})\} & \text{if } \frac{n\theta_0}{4\pi d \log d} > \exp(\frac{d}{8}), \\ \min\{O(\frac{\tan^2 \theta_0 \log d}{\log(n\theta_0)}), O(\frac{\log d}{n^{2/d}})\} & \text{if } 1 \leq \frac{n\theta_0}{4\pi d \log d} \leq \exp(\frac{d}{8}) \\ O(\frac{1}{n}) & \text{if } \frac{n\theta_0}{4\pi d \log d} < 1. \end{cases}$$

By [Lemma C.2](#), we know that  $\min_{\mathcal{A}^{\text{random}}} \max_{w^*} \mathbb{E}_X L(\mathcal{A}^{\text{random}}, X, w^*) \in \Omega(1)$ . Thus, we have

$$\mathcal{G}(\mathcal{A}, X)^{-1} \leq O(\frac{1}{d}) + \begin{cases} \min\{O(\frac{\tan^2 \theta_0 \log d}{d^2}), O(\frac{\log d}{n^{2/d}})\} & \text{if } \frac{n\theta_0}{4\pi d \log d} > \exp(\frac{d}{8}), \\ \min\{O(\frac{\tan^2 \theta_0 \log d}{\log(n\theta_0)}), O(\frac{\log d}{n^{2/d}})\} & \text{if } 1 \leq \frac{n\theta_0}{4\pi d \log d} \leq \exp(\frac{d}{8}) \\ O(\frac{1}{n}) & \text{if } \frac{n\theta_0}{4\pi d \log d} < 1. \end{cases}$$

□
